# Supplementary material for: Early Moderate Intensity Aerobic Exercise Intervention Prevents Doxorubicin-caused Cardiac Dysfunction through Inhibition of Cardiac Fibrosis and Inflammation
Source: PubMed Central journal article supplement (PMC7281105; doi:10.3390/cancers12051102), 2020-04-28
Supplement: cancers-12-01102-s001.pdf [file cancers-12-01102-s001.pdf]

Supplementary Figures

# Early Moderate Intensity Aerobic Exercise Intervention Prevents Doxorubicin-caused Cardiac Dysfunction through Inhibition of Cardiac Fibrosis and Inflammation

Hsin-Lun Yang, Pei-Ling Hsieh, Ching-Hsia Hung, Hui-Ching Cheng, Wan-Ching Chou, Pei-Ming Chu, Yun-Ching Chang and Kun-Ling Tsai

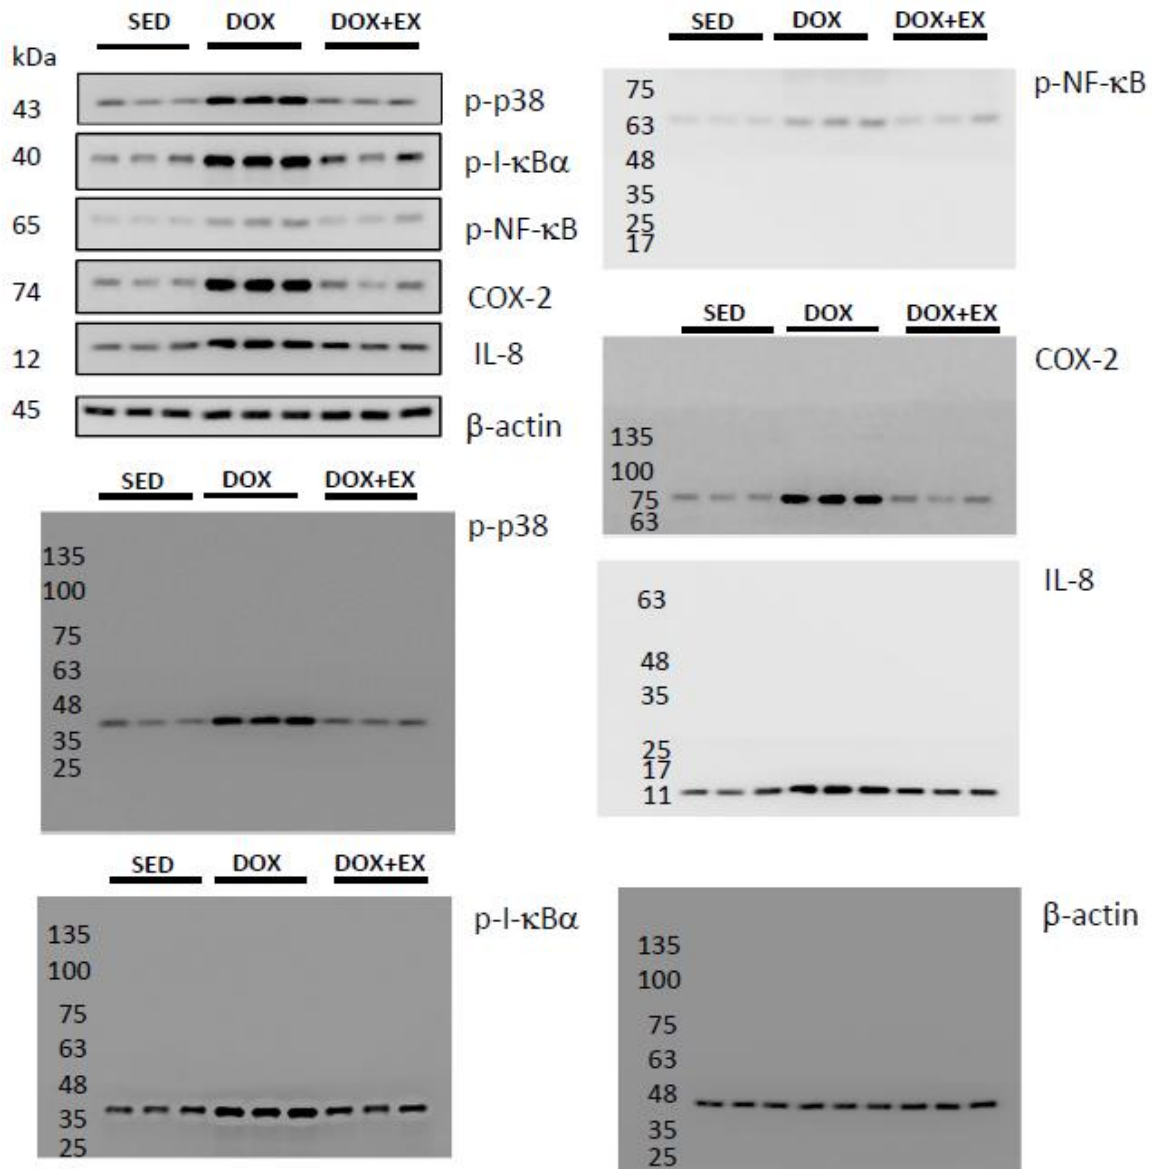

Figure S1. Detailed information about Figure 2B.

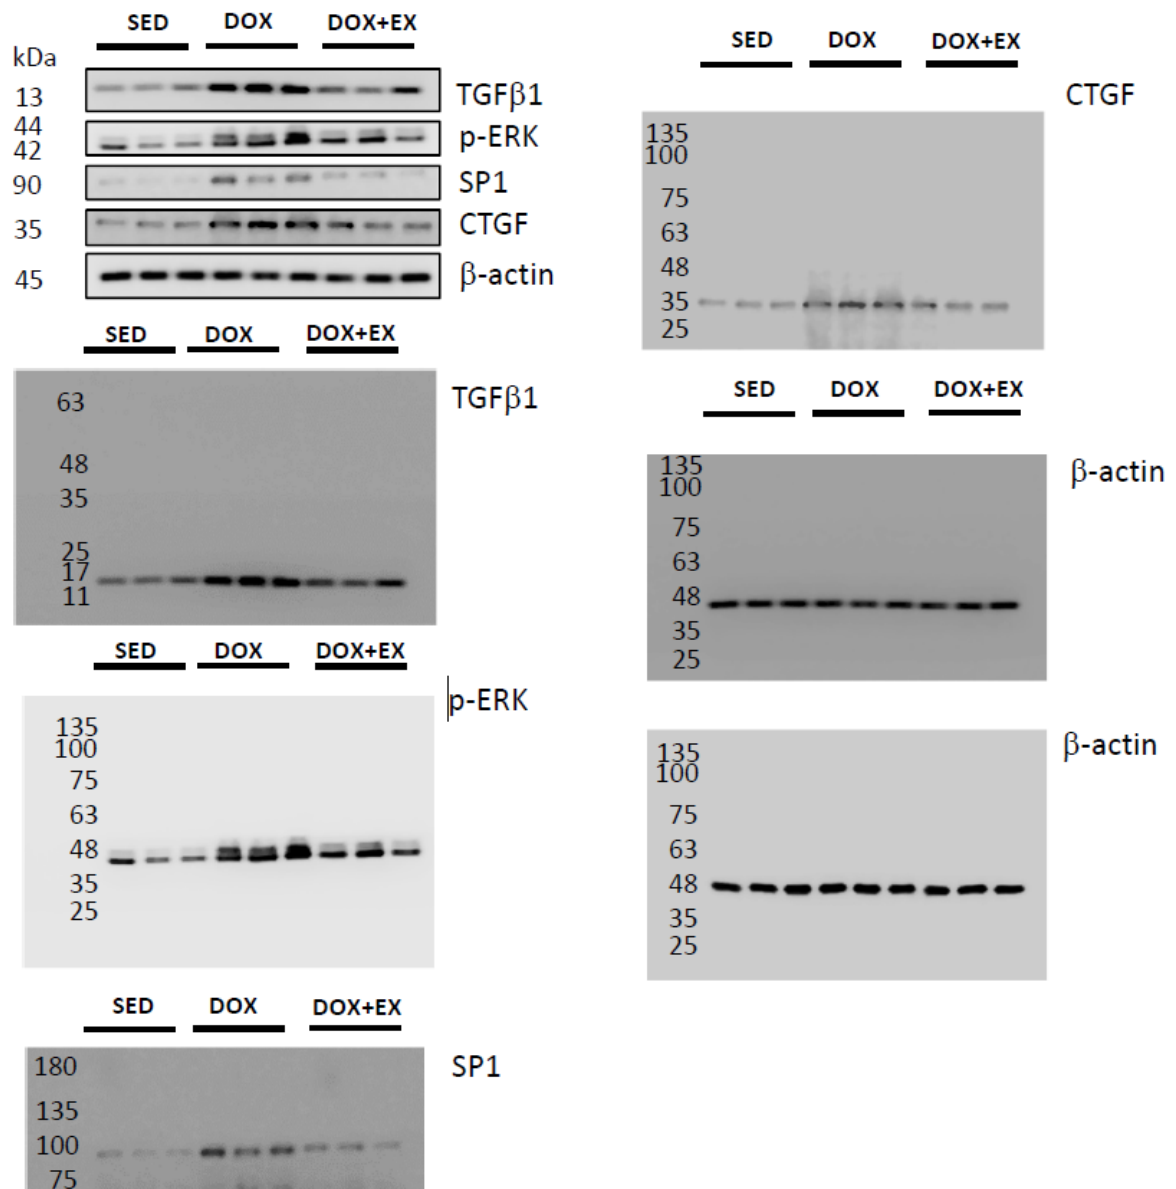

Figure 2. Detailed Information about Figure 3A.

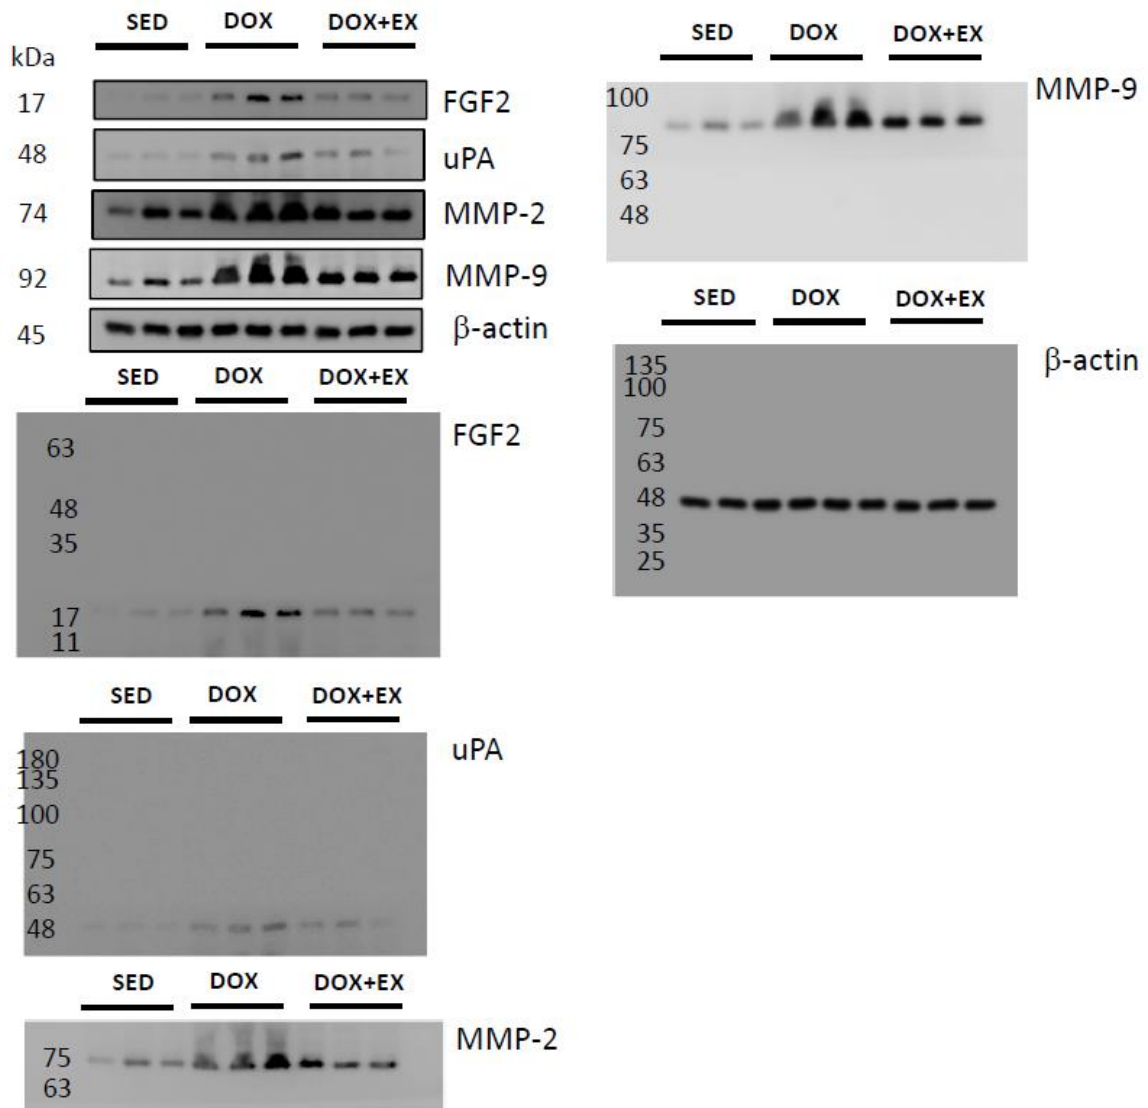

Figure 3. Detailed information about Figure 4A.

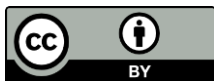

© 2020 by the authors. Licensee MDPI, Basel, Switzerland. This article is an open access article distributed under the terms and conditions of the Creative Commons Attribution (CC BY) license (<http://creativecommons.org/licenses/by/4.0/>).
